# Supplementary material for: An exploratory pilot study evaluating the supplementation of standard antibiotic therapy with probiotic lactobacilli in south African women with bacterial vaginosis
Source: PubMed Central journal article supplement (PMC6751625; doi:10.1186/s12879-019-4425-1), 2019-09-18
Supplement: 12879_2019_4425_MOESM1_ESM.pdf [file 12879_2019_4425_MOESM1_ESM.pdf]

**Table S1** Primers and amplified DNA fragments

| Primers                      | Sequence                                                         | Target sequence              | Size of PCR product (bp) | References                 |
|------------------------------|------------------------------------------------------------------|------------------------------|--------------------------|----------------------------|
| L<br>R                       | 5'-TGGAAACAGGTGCTAATACCG-3'<br>5'-CCATTGTGGAAGATTCCC-3'          | <i>Lactobacillus</i> 16 SRNA | 230                      | McOrist <i>et al.</i> 2002 |
| P0<br>P6                     | 5'-GAGAGTTTGATCCTGGCTCAG-3'<br>5'-CTACGGCTACCTTGTACGA-3'         | Eubacterial 16 SRNA          | 1 507                    | Di Cello and Fani, 1996    |
| scr-Rhmn-2Fw<br>scr-Rhmn-2Rv | 5'- AAAGTCGTGTATATGTAGCCGG -3'<br>5'- GAACCGTCTCGTCTTCCAATAG -3' | CRISPR array                 | 562                      | This study                 |
| scr-gass-1Fw<br>scr-gass-1Rv | 5'-CCTATTGTCGAACCCTTACGAA-3<br>5'- GTGCTGAAATGCTTGGTGTAG -3'     | CRISPR array                 | 392                      | This study                 |

**Table S2** *Lactobacillus* strains used to test the primers specificity

| <b>Strain</b>                     | <b>Origin of the strain</b> | <b>Reference</b>                          |
|-----------------------------------|-----------------------------|-------------------------------------------|
| <i>L. gasseri</i> S1011RA2        | Vaginal, South Africa       | Penharkar <i>et al.</i> 2013 <sup>a</sup> |
| <i>L. gasseri</i> S1013RA1        | Vaginal, South Africa       | Penharkar <i>et al.</i> 2013              |
| <i>L. gasseri</i> S1040RAS3       | Vaginal, South Africa       | Penharkar <i>et al.</i> 2013              |
| <i>L. gasseri</i> S1025RA1        | Vaginal, South Africa       | Penharkar <i>et al.</i> 2013              |
| <i>L. gasseri</i> S1184RA1        | Vaginal, South Africa       | Penharkar <i>et al.</i> 2013              |
| <i>L. gasseri</i> S1196RA1        | Vaginal, South Africa       | Penharkar <i>et al.</i> 2013              |
| <i>L. gasseri</i> 16R5            | Vaginal, Sweden             | Larsson <i>et al.</i> 2011 <sup>b</sup>   |
| <i>L. gasseri</i> 6M7             | Vaginal, Sweden             | Larsson <i>et al.</i> 2011                |
| <i>L. gasseri</i> 15M9            | Vaginal, Sweden             | Larsson <i>et al.</i> 2011                |
| <i>L. gasseri</i> 7B1             | Vaginal, Sweden             | Larsson <i>et al.</i> 2011                |
| <i>L. gasseri</i> 20M39           | Vaginal, Sweden             | Larsson <i>et al.</i> 2011                |
| <i>L. gasseri</i> 6M9             | Vaginal, Sweden             | Larsson <i>et al.</i> 2011                |
| <i>L. gasseri</i> 20M37           | Vaginal, Sweden             | Larsson <i>et al.</i> 2011                |
| <i>L. gasseri</i> 16B1            | Vaginal, Sweden             | Larsson <i>et al.</i> 2011                |
| <i>L. gasseri</i> E9B4-1          | Intestinal, Estonia         | Koll <i>et al.</i> 2010 <sup>c</sup>      |
| <i>L. gasseri</i> 177-3           | Intestinal, Estonia         | Koll <i>et al.</i> 2010                   |
| <i>L. gasseri</i> E16B7           | Intestinal, Estonia         | Koll <i>et al.</i> 2010                   |
| <i>L. gasseri</i> E101G2-4-2      | Intestinal, Estonia         | Koll <i>et al.</i> 2010                   |
| <i>L. rhamnosus</i> 16.5.2-1      | Vaginal, Sweden             | Penharkar <i>et al.</i> 2015 <sup>d</sup> |
| <i>L. rhamnosus</i> 17.3.2-3      | Vaginal, Sweden             | Penharkar <i>et al.</i> 2015              |
| <i>L. rhamnosus</i> 23.2.2-1      | Vaginal, Sweden             | Penharkar <i>et al.</i> 2015              |
| <i>L. rhamnosus</i> GG ATCC 53103 | Intestinal, US              | Gorbach and Goldin, 1983                  |
| <i>L. rhamnosus</i> 35-DLB-5      | Oral, Estonia               | Koll <i>et al.</i> 2008 <sup>e</sup>      |
| <i>L. rhamnosus</i> 14-DLB-8      | Oral, Estonia               | Koll <i>et al.</i> 2008                   |
| <i>L. rhamnosus</i> 19-DLB-2A     | Oral, Estonia               | Koll <i>et al.</i> 2008                   |
| <i>L. rhamnosus</i> 19-DLB-5      | Oral, Estonia               | Koll <i>et al.</i> 2008                   |
| <i>L. rhamnosus</i> 21-DLB-5B     | Oral, Estonia               | Koll <i>et al.</i> 2008                   |
| <i>L. rhamnosus</i> 21-DLB-7      | Oral, Estonia               | Koll <i>et al.</i> 2008                   |
| <i>L. rhamnosus</i> 23-DLB-2      | Oral, Estonia               | Koll <i>et al.</i> 2008                   |
| <i>L. rhamnosus</i> 23-DLB-5      | Oral, Estonia               | Koll <i>et al.</i> 2008                   |
| <i>L. rhamnosus</i> 23-DLB-6      | Oral, Estonia               | Koll <i>et al.</i> 2008                   |
| <i>L. mucosae</i> S1002RA1        | Vaginal, South Africa       | Penharkar <i>et al.</i> 2013              |
| <i>L. paracasei</i> S1002RA4      | Vaginal, South Africa       | Penharkar <i>et al.</i> 2013              |
| <i>L. coleohominis</i> S1003RA4S  | Vaginal, South Africa       | Penharkar <i>et al.</i> 2013              |
| <i>L. crispatus</i> S1003RA1B     | Vaginal, South Africa       | Penharkar <i>et al.</i> 2013              |
| <i>L. crispatus</i> S1040RAS1     | Vaginal, South Africa       | Penharkar <i>et al.</i> 2013              |
| <i>L. crispatus</i> S1098RAR1     | Vaginal, South Africa       | Penharkar <i>et al.</i> 2013              |
| <i>L. crispatus</i> S1056RA1      | Vaginal, South Africa       | Penharkar <i>et al.</i> 2013              |
| <i>L. crispatus</i> S1083RA1      | Vaginal, South Africa       | Penharkar <i>et al.</i> 2013              |
| <i>L. crispatus</i> S1178RA1      | Vaginal, South Africa       | Penharkar <i>et al.</i> 2013              |
| <i>L. crispatus</i> S1181RA1      | Vaginal, South Africa       | Penharkar <i>et al.</i> 2013              |
| <i>L. crispatus</i> S1182RA1      | Vaginal, South Africa       | Penharkar <i>et al.</i> 2013              |
| <i>L. crispatus</i> S1185RA3      | Vaginal, South Africa       | Penharkar <i>et al.</i> 2013              |
| <i>L. crispatus</i> S1197RA3      | Vaginal, South Africa       | Penharkar <i>et al.</i> 2013              |
| <i>L. vaginalis</i> S1004RA1      | Vaginal, South Africa       | Penharkar <i>et al.</i> 2013              |
| <i>L. vaginalis</i> S1008RA1      | Vaginal, South Africa       | Penharkar <i>et al.</i> 2013              |
| <i>L. vaginalis</i> S1040RAS2     | Vaginal, South Africa       | Penharkar <i>et al.</i> 2013              |
| <i>L. vaginalis</i> S1098RAP1     | Vaginal, South Africa       | Penharkar <i>et al.</i> 2013              |

|                               |                                |                               |
|-------------------------------|--------------------------------|-------------------------------|
| <i>L. vaginalis</i> S1131RAB1 | Vaginal, South Africa          | Pendharkar <i>et al.</i> 2013 |
| <i>L. iners</i> S1183BA1      | Vaginal, South Africa          | Pendharkar <i>et al.</i> 2013 |
| <i>L. iners</i> S1006BA2      | Vaginal, South Africa          | Pendharkar <i>et al.</i> 2013 |
| <i>L. iners</i> S1008BA4      | Vaginal, South Africa          | Pendharkar <i>et al.</i> 2013 |
| <i>L. iners</i> S1116BA1      | Vaginal, South Africa          | Pendharkar <i>et al.</i> 2013 |
| <i>L. ruminis</i> S1002RA9    | Vaginal, South Africa          | Pendharkar <i>et al.</i> 2013 |
| <i>L. ruminis</i> S1174RA1    | Vaginal, South Africa          | Pendharkar <i>et al.</i> 2013 |
| <i>L. ruminis</i> S1175RA1    | Vaginal, South Africa          | Pendharkar <i>et al.</i> 2013 |
| <i>L. jensenii</i> S1014RA1   | Vaginal, South Africa          | Pendharkar <i>et al.</i> 2013 |
| <i>L. jensenii</i> S1132RA1   | Vaginal, South Africa          | Pendharkar <i>et al.</i> 2013 |
| <i>L. jensenii</i> S1185RA1   | Vaginal, South Africa          | Pendharkar <i>et al.</i> 2013 |
| <i>L. jensenii</i> S1196RA3   | Vaginal, South Africa          | Pendharkar <i>et al.</i> 2013 |
| <i>L. plantarum</i> TU196     | Intestinal, Estonia and Sweden | Koll <i>et al.</i> 2010       |
| <i>L. fermentum</i> 338-1-1   | Intestinal, Estonia and Sweden | Koll <i>et al.</i> 2010       |
| <i>L. acidophilus</i> 821-3   | Intestinal, Estonia and Sweden | Koll <i>et al.</i> 2010       |

<sup>a</sup> Pendharkar S, Magopane T, Larsson PG, de Bruyn G, Gray GE, Hammarström L, Marcotte H. Identification and characterisation of vaginal lactobacilli from South African women. *BMC Infect Dis.* 2013 Jan 26; 13:43.

<sup>b</sup> Larsson PG, Brandsborg E, Forsum U, Pendharkar S, Andersen KK, Nasic S, Hammarström L, Marcotte H. Extended antimicrobial treatment of bacterial vaginosis combined with human lactobacilli to find the best treatment and minimize the risk of relapses. *BMC Infect Dis.* 2011 Aug 19; 11:223.

<sup>c</sup> Kõll P, Mändar R, Smidt I, Hütt P, Trusalu K, Mikelsaar RH, Shchepetova J, Krogh-Andersen K, Marcotte H, Hammarström L, Mikelsaar M. Screening and evaluation of human intestinal lactobacilli for the development of novel gastrointestinal probiotics. *Curr Microbiol.* 2010 Dec; 61(6):560-6.

<sup>d</sup> Pendharkar S, Brandsborg E, Hammarström L, Marcotte H, Larsson PG. Vaginal colonisation by probiotic lactobacilli and clinical outcome in women conventionally treated for bacterial vaginosis and yeast infection. *BMC Infect Dis.* 2015 Jul 3; 15:255.

<sup>e</sup> Kõll P, Mändar R, Marcotte H, Leibur E, Mikelsaar M, Hammarström L. Characterization of oral lactobacilli as potential probiotics for oral health. *Oral Microbiol Immunol.* 2008 Apr; 23(2):139-47.

**Table S3** Factors associated with bacterial vaginosis during follow-up

| <b>Variable</b>                                      | <b>n or median (IQR)</b> | <b>Univariate</b>  |                | <b>Multivariate</b> |                |
|------------------------------------------------------|--------------------------|--------------------|----------------|---------------------|----------------|
|                                                      |                          | <b>RR (95% CI)</b> | <b>p-value</b> | <b>RR (95% CI)</b>  | <b>p-value</b> |
| <b>Study Arm</b>                                     |                          |                    |                |                     |                |
| Healthy + probiotic (Group 1)                        | 13 (33.3)                | Ref                |                | Ref                 |                |
| BV + antibiotic + probiotic (Group 2)                | 12 (30.8)                | 5.03 (1.90-13.4)   | 0.0012         | 3.60 (1.32-9.81)    | 0.0123         |
| BV + antibiotic (Group 3)                            | 14 (35.9)                | 4.90 (1.75-13.7)   | 0.0025         | 4.39 (1.59-12.2)    | 0.0044         |
| <b>Age-Group</b>                                     |                          |                    |                |                     |                |
| 18-29 years                                          | 19 (48.7)                | Ref                |                |                     |                |
| 30-40 years                                          | 20 (51.3)                | 0.92 (0.43-1.95)   | 0.8277         |                     |                |
| <b>Education</b>                                     |                          |                    |                |                     |                |
| Secondary                                            | 33 (84.6)                | Ref                |                |                     |                |
| Tertiary                                             | 6 (15.4)                 | 0.87 (0.27-2.77)   | 0.8160         |                     |                |
| <b>Employment</b>                                    |                          |                    |                |                     |                |
| Yes                                                  | 9 (23.1)                 | 1.61 (0.77-3.35)   | 0.2084         |                     |                |
| No                                                   | 30 (76.9)                | Ref                |                |                     |                |
| <b>Housing type</b>                                  |                          |                    |                |                     |                |
| Shack                                                | 5 (12.8)                 | 0.99 (0.43-2.25)   | 0.9789         |                     |                |
| Brick house                                          | 34 (87.2)                | Ref                |                |                     |                |
| <b>Alcohol use</b>                                   |                          |                    |                |                     |                |
| Yes                                                  | 24 (61.5)                | 0.86 (0.41-1.80)   | 0.6811         |                     |                |
| No                                                   | 15 (38.5)                | Ref                |                |                     |                |
| <b>Tobacco use</b>                                   |                          |                    |                |                     |                |
| Yes                                                  | 12 (30.8)                | 1.73 (0.84-3.55)   | 0.1377         | 1.88 (0.91-3.87)    | 0.0876         |
| No                                                   | 27 (69.2)                | Ref                |                | Ref                 |                |
| <b>Abnormal fishy discharge</b>                      |                          |                    |                |                     |                |
| Yes                                                  | 14 (35.9)                | 1.26 (0.62-2.56)   | 0.5241         |                     |                |
| No                                                   | 25 (64.1)                | Ref                |                |                     |                |
| <b>Ever treated for an STI in the past 12 months</b> |                          |                    |                |                     |                |
| Yes                                                  | 4 (10.5)                 | 0.25 (0.07-0.86)   | 0.0288         | 0.40 (0.17-0.96)    | 0.0413         |
| No                                                   | 34 (89.5)                | Ref                |                | Ref                 |                |
| <b>Ever treated for BV in the past 12 months</b>     |                          |                    |                |                     |                |
| Yes                                                  | 2 (5.1)                  | 2.07 (1.37-3.12)   | 0.0005         | 2.31 (1.16-4.60)    | 0.0173         |
| No                                                   | 37 (94.9)                | Ref                |                | Ref                 |                |

| <b>Variable</b>                                 | <b>n or median<br/>(IQR)</b> | <b>Univariate</b>  |                | <b>Multivariate</b> |                |
|-------------------------------------------------|------------------------------|--------------------|----------------|---------------------|----------------|
|                                                 |                              | <b>RR (95% CI)</b> | <b>p-value</b> | <b>RR (95% CI)</b>  | <b>p-value</b> |
| <b>Sex debut age</b>                            |                              |                    |                |                     |                |
| < 18 years                                      | 15 (38.5)                    | Ref                |                |                     |                |
| => 18 years                                     | 24 (61.5)                    | 1.05 (0.47-2.35)   | 0.9085         |                     |                |
| <b>Condom use</b>                               |                              |                    |                |                     |                |
| Consistent                                      | 6 (15.4)                     | Ref                |                |                     |                |
| Inconsistent                                    | 33 (84.6)                    | 0.57 (0.16-2.07)   | 0.3942         |                     |                |
| <b>Frequency of weekly vaginal sex</b>          | 2 (1-3)                      | 1.03 (0.77-1.39)   | 0.8270         |                     |                |
| <b>Do you use soap to wash your vagina?</b>     |                              |                    |                |                     |                |
| Yes                                             | 17 (43.6)                    | 0.84 (0.38-1.89)   | 0.6808         |                     |                |
| No                                              | 22 (56.4)                    | Ref                |                |                     |                |
| <b>Number of partners</b>                       | 1 (1-1)                      | 0.77 (0.48-1.21)   | 0.2532         |                     |                |
| <b>Number of partners in the past 12 months</b> | 1 (1-2)                      | 0.89 (0.56-1.40)   | 0.6088         |                     |                |

**A) *L. rhamnosus* DSM 14870**

caactgaagggtttttgatctgacatctacctgagactgccgcgtcgatctttgtcaatacccgagtgttcttgaactgattgat  
ctgacatctacctgagaccaagcgggtgggcaaacctcacttcgtcatcagttcttgaactgattgatctgacatctacctgaga  
ccttttttcggccttgattgatattgttcttgaactgattgatctgacatctacctgagaccaacggccagcgacag  
cgcaacgcgtcaacgttcttgaactgattgatctgacatctacctgagactggcgcaacgggaacaaggggcaaaatattggtt  
cttgaactgattgatctgacatctacctgagacgttcttgcacaaaccttgcggccatccttgtagttcttgaactgattgatct  
gacatctacctgagacgaaacaagtcggataggtatcattagcagttcttgaactgattgatctgacatctacctgagacg  
gaaagtgggtacaccgttgaggccgaactgttcttgaactgattgatctgacatctacctgagactgocgctgcttttgattt  
tgaagatgccgcgttcttgaactgattgatctgacatctacctgagacaacggtaagccacacaagcgactaacacgcgttct  
tgaactgattgatctgacatctacctgagacctcggcgccgttgatggatcaatgtcagcgaattcttgaactgattgatctga  
catctacctgagacaacgtgcaagggttctgccaactgcgtcatgttcttgaactgattgatctgacatctacctgagacggc  
agcaattgccggctgttgttgatgttggttcttgaactgattgatctgacatctacctgagacgtaaatcgtgcccgtatttta  
cttggctattgttcttgaactgattgatctgacatctacctgagacattaccacgcgttccgatggtaaaacattcgttcttg  
aactgattgatctgacatctacctgagacacatacatttcttttacgcatcgtgttcagttcttgaactgattgatctgaca  
tctacctgagacaacggcactcgtgatgatggatgactacgttcttgaactgattgatctgacatctacctgagacggcga  
caactggagcgttttcggttgctattgttcttgaactgattgatctgacatctacctgagacgctgtcagcgaagaccattgcg  
ttcgcgggttcttgaactgattgatctgacatctacctgagacgctggcatcggtcacggctttaaattgcccgttcttga  
ctgattgatctgacatctacctgagactatttgggaaaatacaagcccatcataaaaattcttgaactgattgatctgacatc  
tacctgagactgcaacgcgcgcacgtggatgttgcacgactgttcttgaactgattgatctgacatctacctgagacagaccaa  
ccggagagcgttaagcgtcattaattcttgaactgattgatctgacatctacctgagacagcttcaattgactattgcccgtt  
tccagagttcttgaactgattgatctgacatctacctgagaccgaaagtcgtgtatattgtagccggcacctgagttcttga  
ctgattgatctgacatctacctgagactgaaatgagtggtcaacttaagaactttcgttcttgaactgattgatctgacatc  
tacctgagaccaggaatgtacatccgcgctcaatcaactgttcttgaactgattgatctgacatctacctgagaccagttt  
ttggttcttgaactgattgatctgacatctacctgagacactcgttgcggctcattttcttctt  
gcttgaattcttgaactgattgatctgacatctacctgagacaaagctctgaaagtggcaggactgtttctcgttcttga  
actgattgatctgacatctacctgagactcatctataagcaaatcgatctcaacattcgttcttgaactgattgatctgacatc  
tacctgagacgaagggagaagggaaatagttggaccttacaattcttgaactgattgatctgacatctacctgagaccaaggactg  
tcaatttgaactgattgatctgacatctacctgagacttgccaccaccagtcacaaactgga  
ggtattcttgaactgattgatctgacatctacctgagacgggtgttttcacacagcctcttaataatcagttctcggc

**B) *L. gasseri* DSM 14869**

attggcaaatatttagtaataaaatgctgatttgacgggatttttttagtattctccacgtatgtggagatgatcctaccg  
tattcccaattagcataggttgaaagtcgtattctccacgtatgtggagatgatcctattgtcgaaccttacgaaataccctag  
gttagcgtattctccacgtatgtggagatgatcctaaagtttgcctcccaaaagtcctggaatgtattcgtattctccacgtatg  
tggagatgatcctaacggagaagattgaagaaactatcaatcagattctccacgtatgtggagatgatccttaattcaga  
cattacggaggaatagaaaatgggtattctccacgtatgtggagatgatcctagcgtatggaggtgcttcaatgagtgcaatt  
agtattctccacgtatgtggagatgatcctgtttgtttaaacttacataattataatagattctccacgtatgtggag  
atgatcctgttacaccaagcatttcagcacatcttgaattctccacgtatgtggagatgatccttgctttgaaatcc  
attgaaatogcttctttagtattctccacgtatgtggagatgatccttctcctttctaccctgtatcgttttctccttctg  
tctccacgtatgtggagatgatcctactgctaaggctcgaaatattagctgatgtgaaattctccacgtatgtggagatgat  
ccttccctctcaatttttccattctcttctttagtattctccacgtatgtggagatgatccttattgagaggtgaaaacat  
ggaaaaagtaaaattctccacgtatgtggagatgatcctgcaagctacccgctctggtgctgcccacaaagaggtattctc  
cacgtatgtggagatgatcctggaataaagaatcaaatcgaatcaaatagagattctccacgtatgtggagatgatcct  
gaatcaaatagaatcataagaattattaatagattctccacgtatgtggagatgatcctaaaaatcatggatttatcagaat  
tagaaaagggtattctccacgtatgtggagatgatcctggcatcaggggcacaaatccaaacctataagaattctccacgt  
atgtggagatgatcctaaagactcaatctgaagaagtaaaagatgaagtattctccacgtatgtggagatgatcctaaagcca  
gttcgaagggctactaactgggataaattctccacgtatgtggagatgatccttaatgccattccttgggataaaccatt  
tccggtattctccacgtatgtggagatgatccttgccctgaatttgatcgttttaaggttgagatgattctccacgtatgtg  
gagatgatcccataaattcattggataaatttaccatgattcttattctccacgtatgtggagatgatcctgaaaaagaagc  
ctgacgatgaaaaacaatttggattctccacgtatgtggagatgatccttaaccaacttttgcgtcgaatatccaaacaag  
tattctccacgtatgtggaggactcctgatagacaaatataatcagcttttaggctaaagtaagaattttgtaggtataaaaa  
atgaaagttagatagctggtgaaagtttttagtgggttaggtttggcaaatggcaaggtatagtagtttttagataa

**Figure S1** Clustered regularly interspaced short palindromic repeats (CRISPRs, in yellow) alternate with spacers of different sequence but similar length. A) *L. rhamnosus* DSM 14870 CRISPR locus, repeat region position between 992959 and 995240, B) *L. gasseri* DSM 14869 CRISPR locus 2 repeat region, position between 434451 and 436005. The primers sequences are indicated in red.

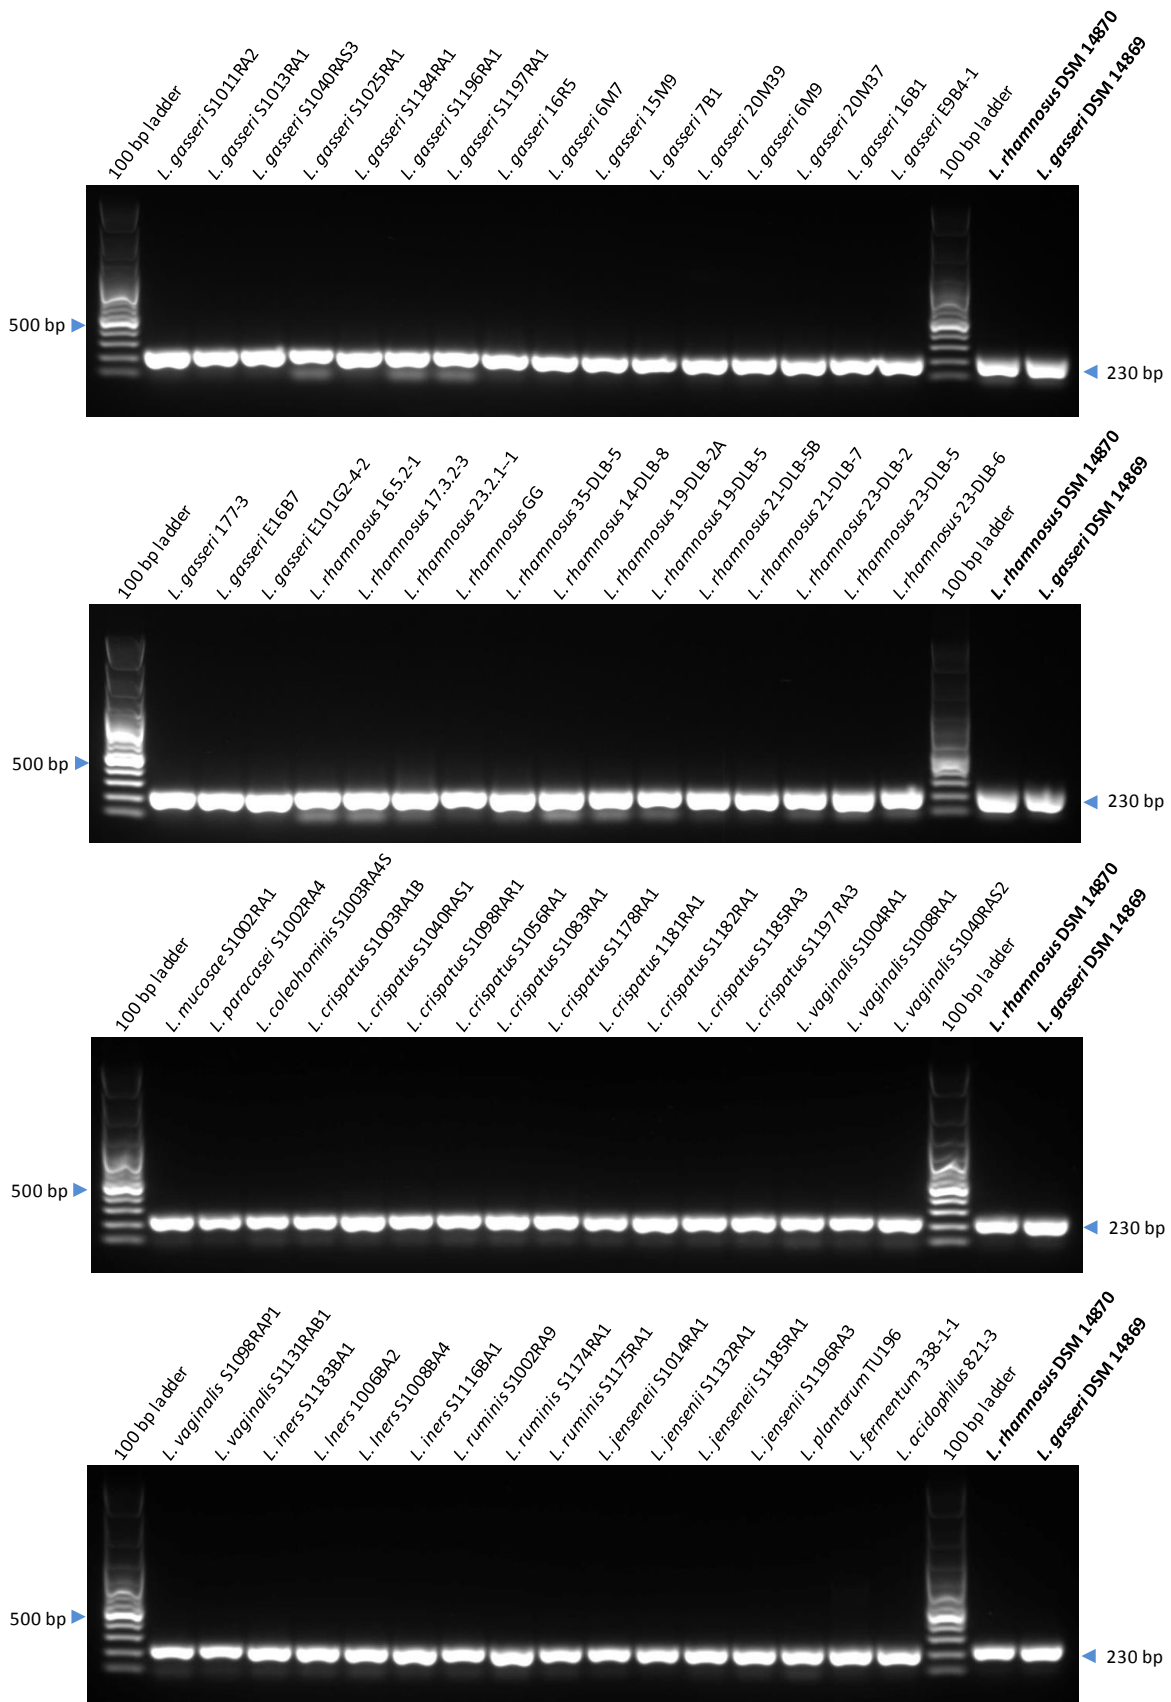

**Figure S2** Amplification of the *Lactobacillus* 16S rRNA gene segment with the genus-specific primers L and R. The theoretical size of the PCR product is indicated on the right of the gel pictures. The origin of the strains used is described in Table S2.

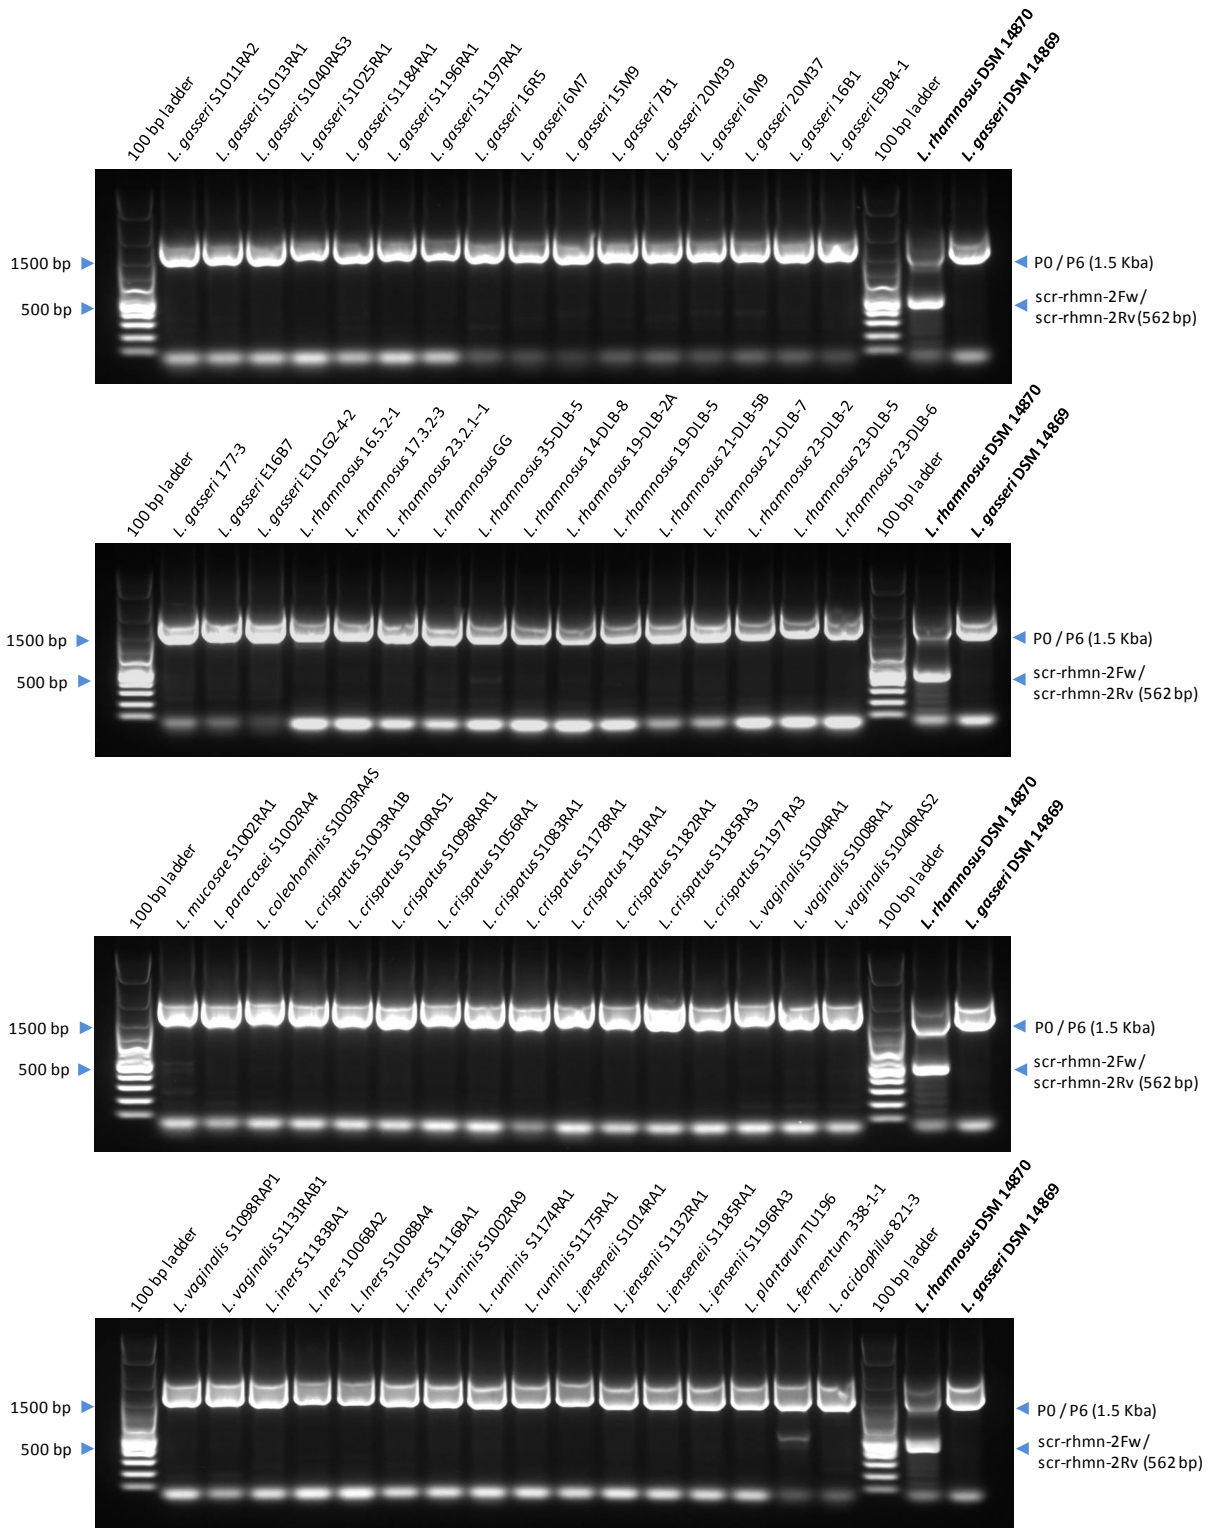

**Figure S3** Specificity of the multiplex PCR for the detection of *L. rhamnosus* DSM 14870. The amplification of the 16S rRNA gene (internal control) with primers P0 and P6 resulted in a 1.5 Kb PCR product for all the *Lactobacillus* strains tested. The amplification of the CRISPR DNA segment with primers scr-rhmn-2Fw and scr-rhmn-2Rv resulted in a ~550 bp PCR product for *L. rhamnosus* DSM 14870 only. An additional light band was observed for *L. fermentum* 338-1-1 but at ~900 bp (lower panel, line 16). The theoretical size of the PCR products is indicated on the right of the gel pictures.



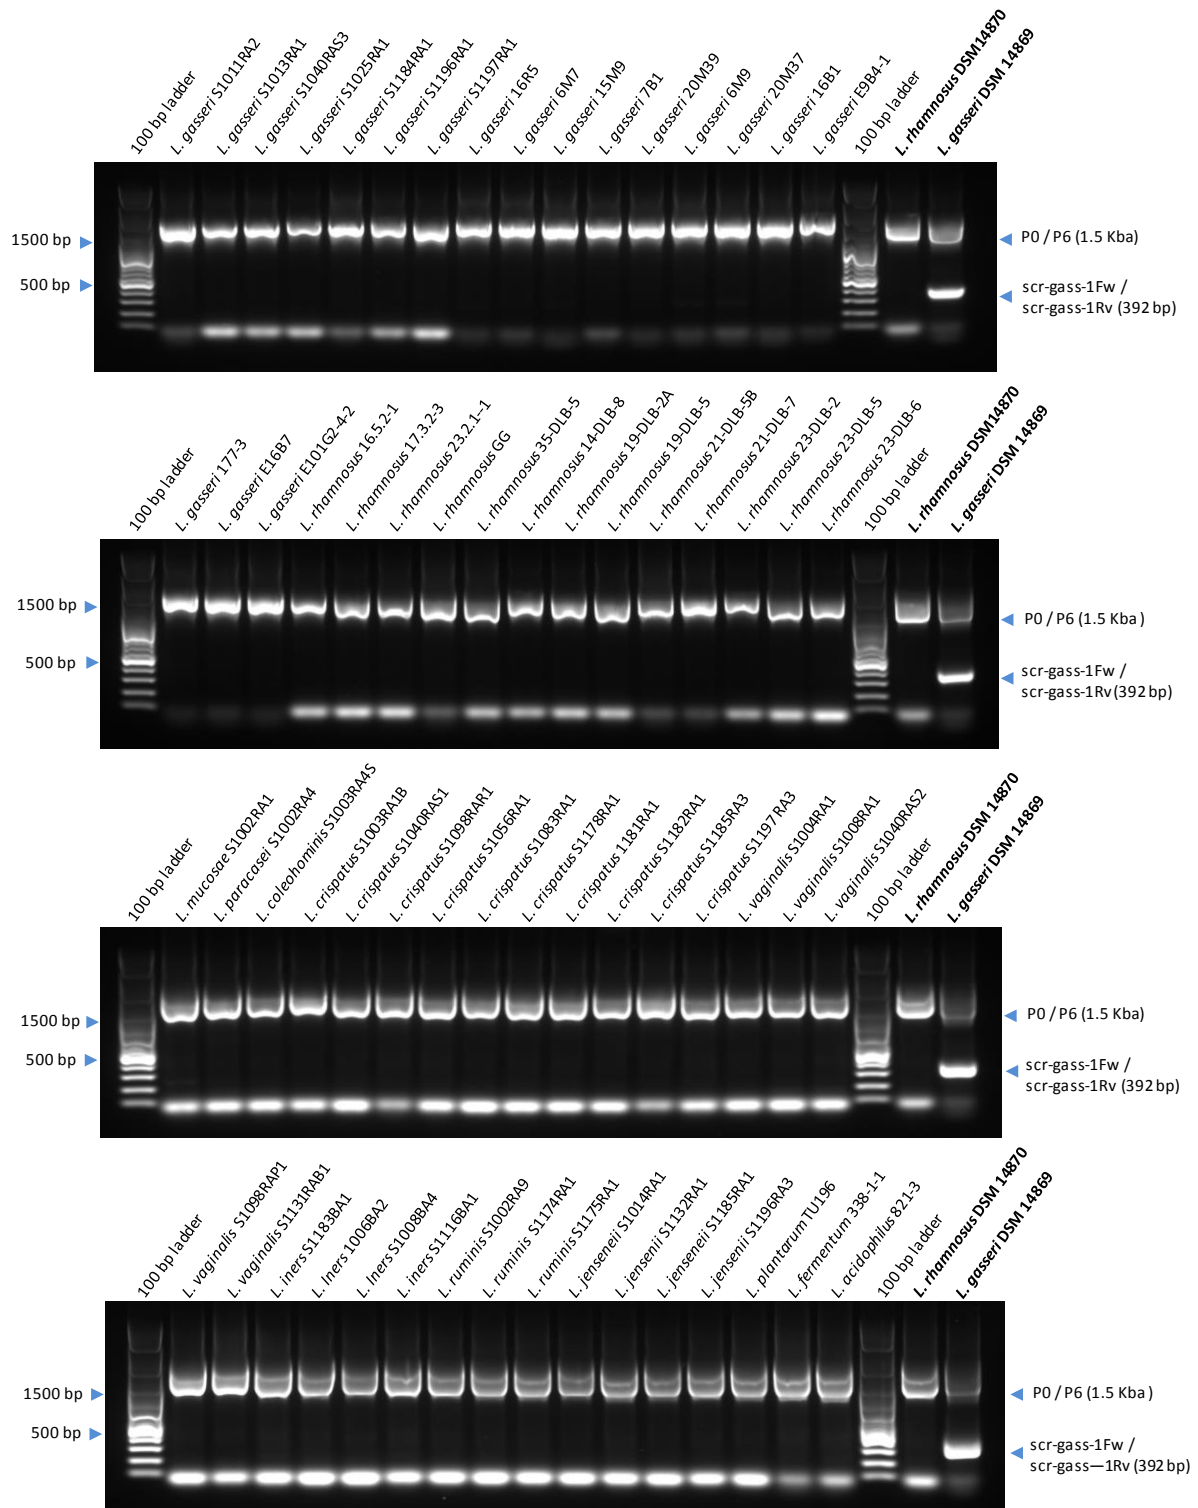

**Figure S4** Specificity of the multiplex PCR for the detection of *L. gasseri* DSM 14869. The amplification of the 16S rRNA gene (internal control) with primers P0 and P6 resulted in a 1.5 Kba PCR product for all the *Lactobacillus* strains tested. The amplification of the CRISPR DNA segment with primers scr-gass-1Fw and scr-gass-1Rv resulted in a ~400 bp PCR product for *L. gasseri* DSM 14869 only. The theoretical size of the PCR products is indicated on the right of the gel pictures.

**A) Healthy, probiotic capsules (Group 1, 13 participants)**

|     | 0 | 2 | 3 | 4 | 5 | 6 | 7 |            |
|-----|---|---|---|---|---|---|---|------------|
| 001 |   |   |   |   |   |   |   | BV visit 5 |
| 002 |   |   |   |   |   |   |   |            |
| 009 |   |   |   |   |   |   |   | BV visit 2 |
| 013 |   |   |   |   |   |   |   |            |
| 040 |   |   |   |   |   |   |   |            |
| 075 |   |   |   |   |   |   |   |            |
| 079 |   |   |   |   |   |   |   | BV visit 7 |
| 103 |   |   |   |   |   |   |   | BV visit 2 |
| 131 |   |   |   |   |   |   |   |            |
| 136 |   |   |   |   |   |   |   |            |
| 147 |   |   |   |   |   |   |   |            |
| 154 |   |   |   |   |   |   |   |            |
| 165 |   |   |   |   |   |   |   |            |

**B) BV, antibiotic with probiotic capsules (Group 2, 12 participants)**

|     | 0 | 2 | 3 | 4 | 5 | 6 | 7 |                        |
|-----|---|---|---|---|---|---|---|------------------------|
| 004 |   |   |   |   |   |   |   |                        |
| 099 |   |   |   |   |   |   |   | cured                  |
| 104 |   |   |   |   |   |   |   |                        |
| 107 |   |   |   |   |   |   |   | cured                  |
| 109 |   |   |   |   |   |   |   |                        |
| 113 |   |   |   |   |   |   |   |                        |
| 119 |   |   |   |   |   |   |   | cured                  |
| 129 |   |   |   |   |   |   |   |                        |
| 130 |   |   |   |   |   |   |   | cured, relapse visit 3 |
| 142 |   |   |   |   |   |   |   |                        |
| 157 |   |   |   |   |   |   |   | cured, relapse visit 4 |
| 170 |   |   |   |   |   |   |   |                        |

**C) BV, antibiotic (Group 3, 14 participants)**

|     | 0 | 2 | 3 | 4 | 5 | 6 | 7 |                        |
|-----|---|---|---|---|---|---|---|------------------------|
| 049 |   |   |   |   |   |   |   | Cured, LTF visit 5     |
| 088 |   |   |   |   |   |   |   |                        |
| 089 |   |   |   |   |   |   |   |                        |
| 102 |   |   |   |   |   |   |   | cured                  |
| 106 |   |   |   |   |   |   |   |                        |
| 108 |   |   |   |   |   |   |   |                        |
| 112 |   |   |   |   |   |   |   |                        |
| 126 |   |   |   |   |   |   |   |                        |
| 128 |   |   |   |   |   |   |   | cured                  |
| 134 |   |   |   |   |   |   |   | cured, relapse visit 3 |
| 151 |   |   |   |   |   |   |   |                        |
| 152 |   |   |   |   |   |   |   | cured                  |
| 159 |   |   |   |   |   |   |   |                        |
| 161 |   |   |   |   |   |   |   | LTF visit 3            |

■ *L. rhamnosus* 14870 ■ *L. gasseri* 14869 ■ *Lactobacillus* ■ No *Lactobacillus* ■ No samples LTF: Lost to follow-up

**Figure S5** Isolation of *L. rhamnosus* DSM 14870 and *L. gasseri* DSM 14869 in vaginal samples.

A)

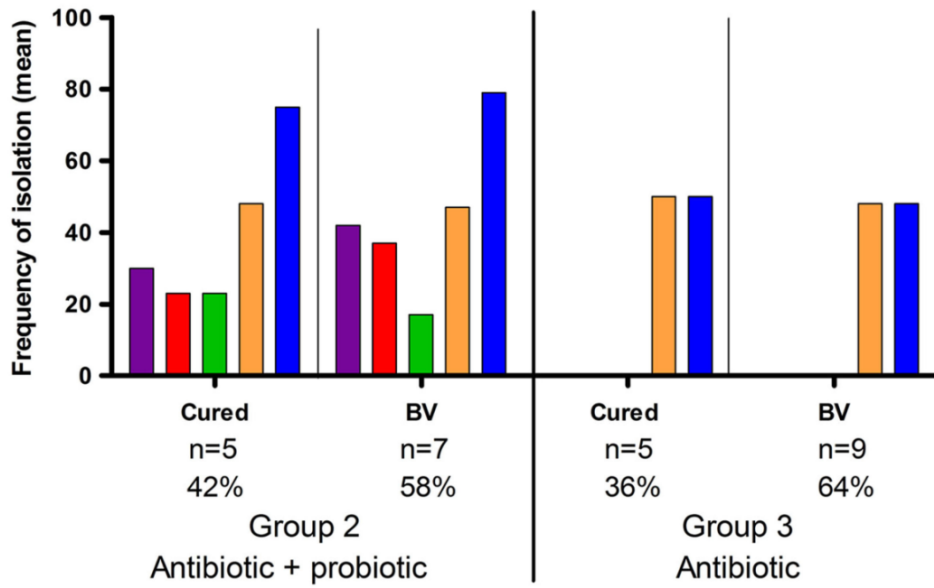

B)

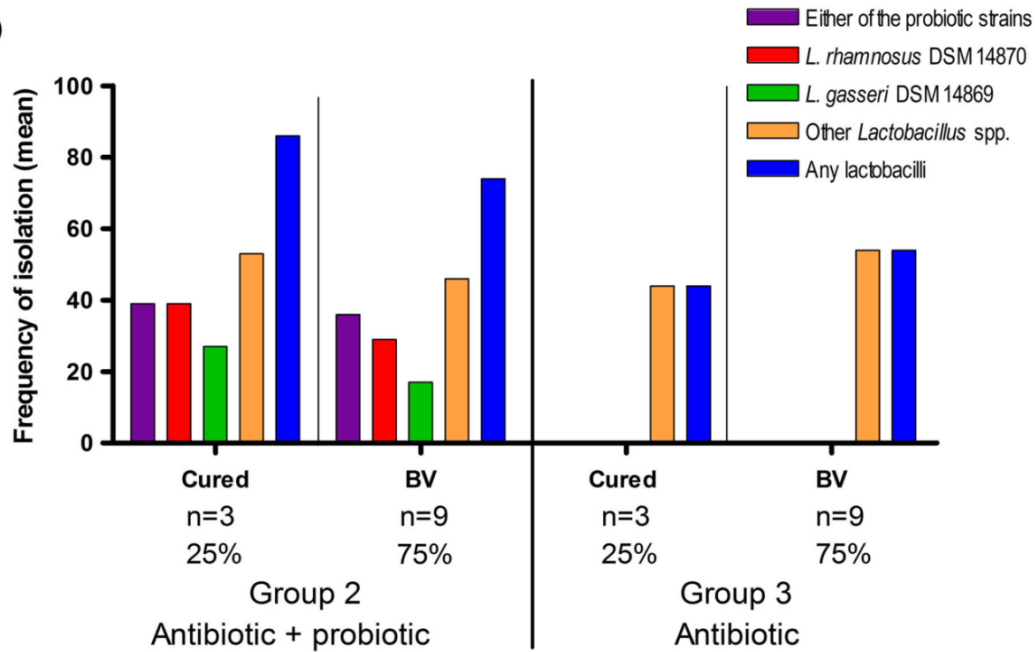

**Figure S6** Association between the mean frequency of isolation of probiotic strains and other lactobacilli with the 1-month (A) and 6-month (B) cure rates. The frequency of isolation (y axis) was determined as the percentage of samples positive for probiotic strains and other lactobacilli on the total number of samples for each individual (cured or BV positive) during the entire follow up. The results are presented as a mean. No statistical difference in frequency of isolation of probiotic strains or other lactobacilli was observed between cured and BV positive women within Group 2 (antibiotic + probiotic) and Group 3 (antibiotic) using a t-test and a p-value cutoff of 0.05 (two tailed).
